# Supplementary material
Source: PubMed Central journal article supplement (PMC3220496)
Supplement: supp_M111.286906_jbc.M111.286906-1.pdf [file supp_M111.286906_jbc.M111.286906-1.pdf]

## Supplementary Information

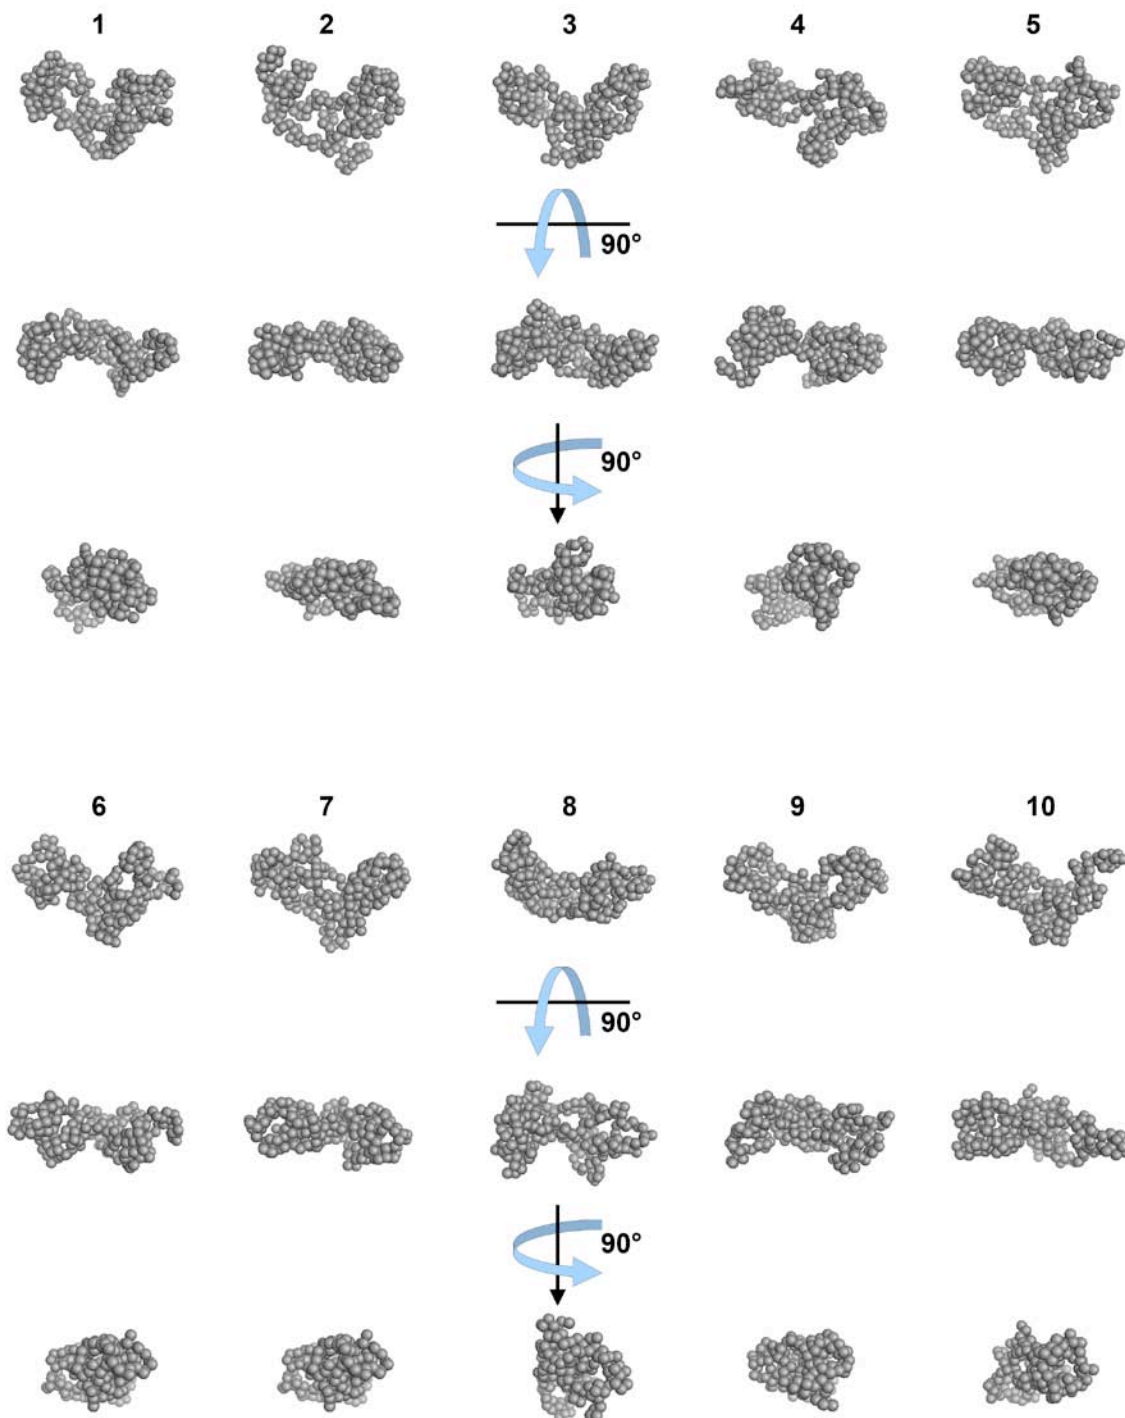

**Figure S1: Reconstructed three-dimensional *ab initio* models of  $\text{Ca}^{2+}/\text{CaM}/\text{NHE1}_{\text{CaMBD}}$ .** Ten single models restored by the program GASBOR are shown. The average shape for the molecular envelope of  $\text{Ca}^{2+}/\text{CaM}/\text{NHE1}_{\text{CaMBD}}$  has been calculated from these ten independent GASBOR models using program DAMAVER.

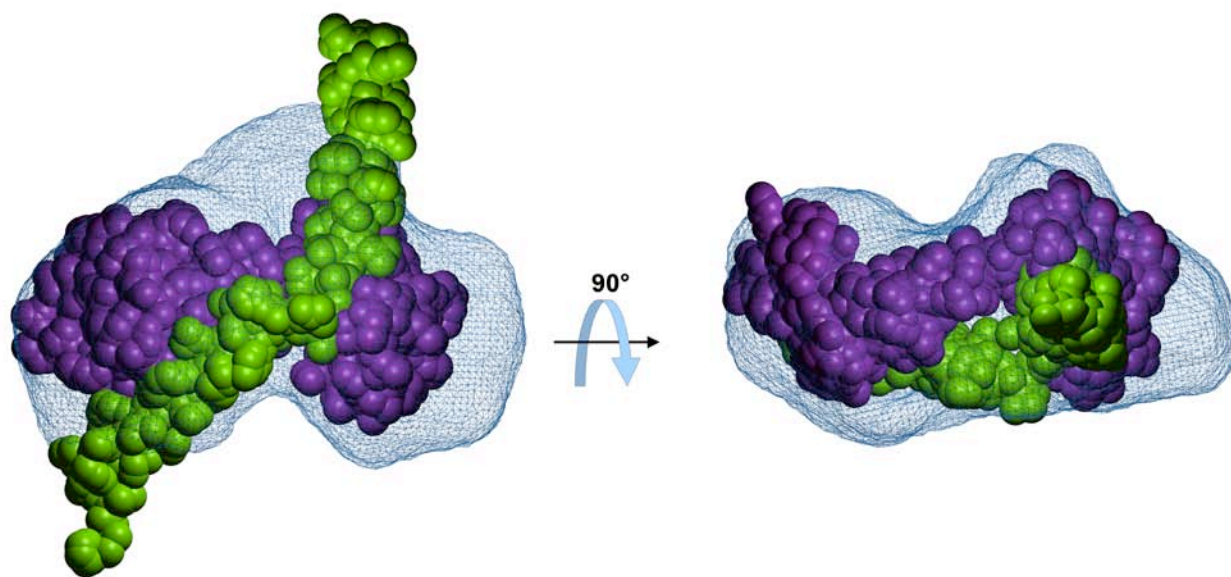

**Figure S2: SAXS analysis of the NHE1<sub>CaMBR</sub>/Ca<sup>2+</sup>/CaM complex structure in solution.** A low-resolution envelope (blue mesh) with the space filled model of NHE1<sub>CaMBR</sub>/Ca<sup>2+</sup>/CaM. NHE1<sub>CaMBR</sub> is shown in green and CaM in purple.
